# Supplementary material for: Two Species Delimitation of Pseudaulacaspis (Hemiptera: Diaspididae) Based on Morphology, Molecular Clustering, and Niche Differentiation
Source: MDPI journal article supplement (doi:10.3390/insects14080666), 2023-07-25

**Figure S2.** The results of Partial ROC for two species.

Note: Partial AUC distribution for two species generated through 1000 bootstrap iterations with 5% omission in the ROC space. Higher partial AUC ratios indicate the better predictive ability of the Maxent model.

A: *Pseudaulacaspis pentagona*

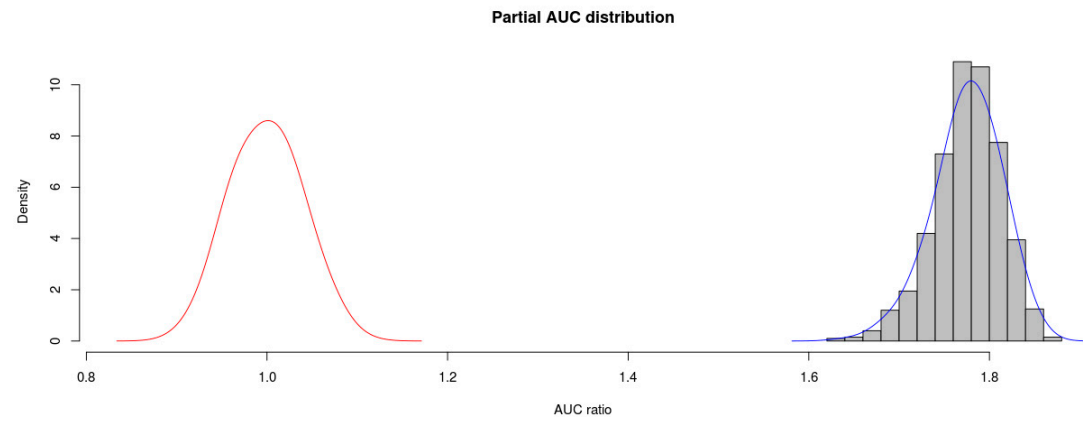

B: *Pseudaulacaspis prunicola*

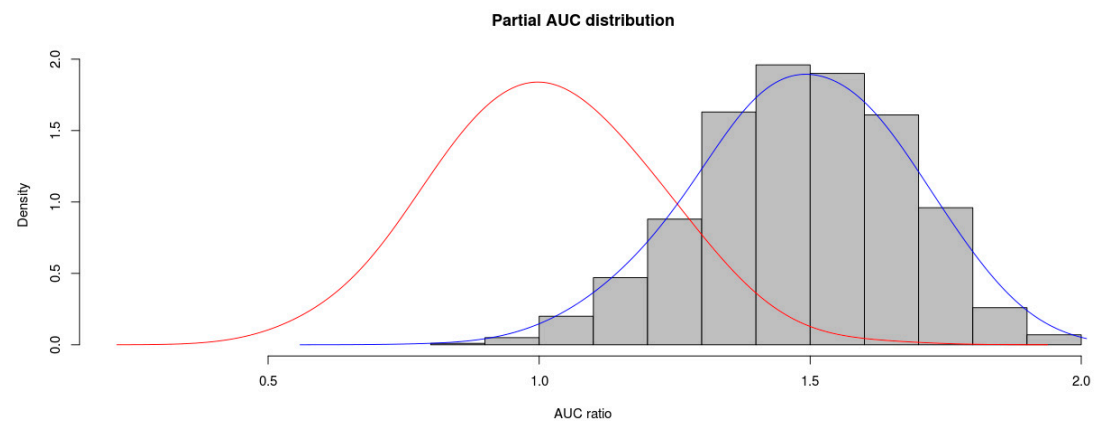

Supplement: s1 [file s1]
