# Supplementary material for: Two Species Delimitation of Pseudaulacaspis (Hemiptera: Diaspididae) Based on Morphology, Molecular Clustering, and Niche Differentiation
Source: MDPI journal article supplement (doi:10.3390/insects14080666), 2023-07-25

**Figure S1.** Performance of niche model under different settings.

A: *P. pentagona*; B: *P. prunicola*

Note: L= Linear; Q= Quadratic; H= Hinge; P= Product; T= Threshold.

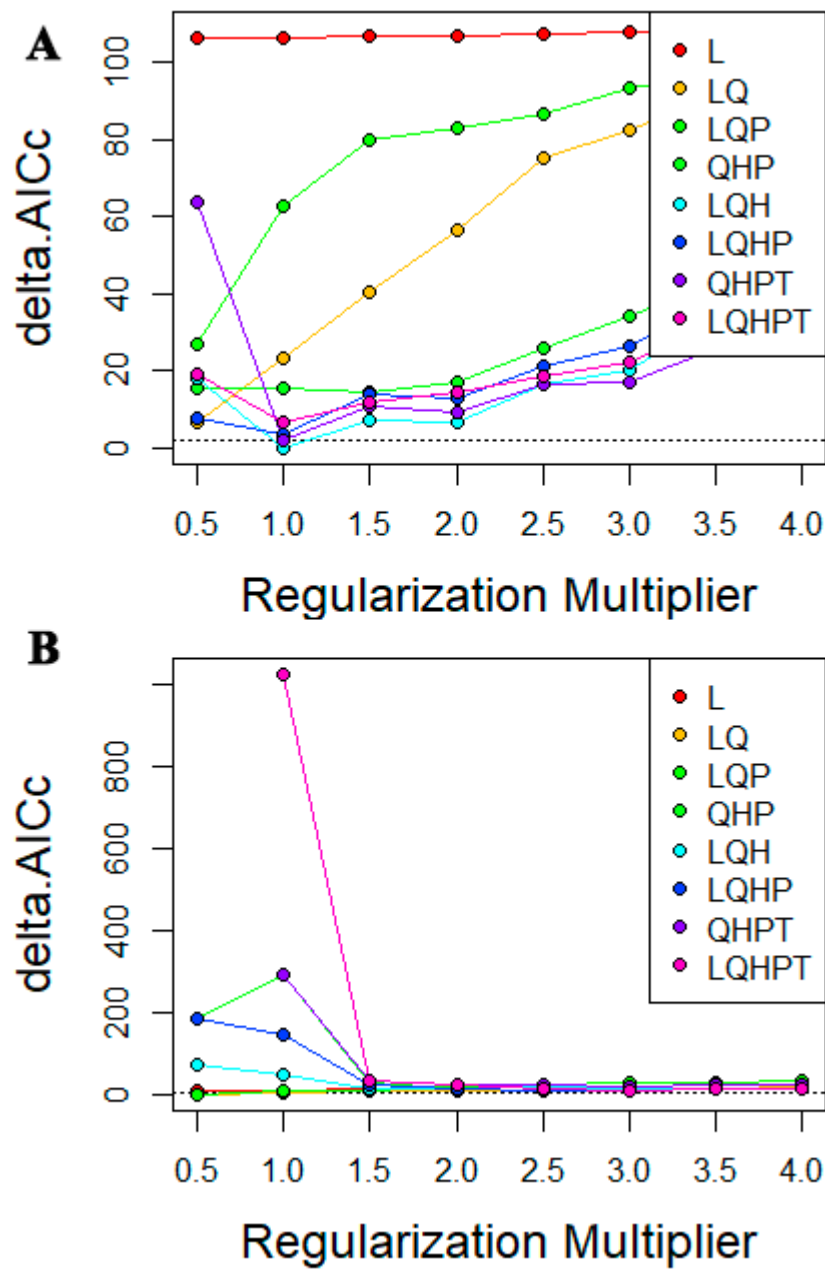

Supplement: s1 [file s1]
