# Supplementary material for: Two Species Delimitation of Pseudaulacaspis (Hemiptera: Diaspididae) Based on Morphology, Molecular Clustering, and Niche Differentiation
Source: MDPI journal article supplement (doi:10.3390/insects14080666), 2023-07-25
Supplement: s1 [file s1]

**Table S3** Pearosn correlation coefficients matrix of climatic variables

|           |               |          |          |                |               |                |                |          |               |           |           |               |               |               |           |               |               |           |           |
|-----------|---------------|----------|----------|----------------|---------------|----------------|----------------|----------|---------------|-----------|-----------|---------------|---------------|---------------|-----------|---------------|---------------|-----------|-----------|
| <b>1</b>  | 1             |          |          |                |               |                |                |          |               |           |           |               |               |               |           |               |               |           |           |
| <b>2</b>  | -.772**       | 1        |          |                |               |                |                |          |               |           |           |               |               |               |           |               |               |           |           |
| <b>3</b>  | .226          | .226     | 1        |                |               |                |                |          |               |           |           |               |               |               |           |               |               |           |           |
| <b>4</b>  | -.801**       | .576**   | -.649**  | 1              |               |                |                |          |               |           |           |               |               |               |           |               |               |           |           |
| <b>5</b>  | .490**        | -.344**  | -.488**  | .105           | 1             |                |                |          |               |           |           |               |               |               |           |               |               |           |           |
| <b>6</b>  | <b>.974**</b> | -.828**  | .279*    | -.884**        | .316**        | 1              |                |          |               |           |           |               |               |               |           |               |               |           |           |
| <b>7</b>  | -.870**       | .762**   | -.451**  | <b>.966**</b>  | -.012         | <b>-.952**</b> | 1              |          |               |           |           |               |               |               |           |               |               |           |           |
| <b>8</b>  | .722**        | -.645**  | -.210    | -.301*         | .669**        | .632**         | -.451**        | 1        |               |           |           |               |               |               |           |               |               |           |           |
| <b>9</b>  | <b>.965**</b> | -.780**  | .280*    | -.855**        | .366**        | <b>.976**</b>  | <b>-.911**</b> | .614**   | 1             |           |           |               |               |               |           |               |               |           |           |
| <b>10</b> | .756**        | -.658**  | -.367**  | -.216          | <b>.914**</b> | .631**         | -.371**        | .841**   | .649**        | 1         |           |               |               |               |           |               |               |           |           |
| <b>11</b> | <b>.970**</b> | -.741**  | .400**   | <b>-.922**</b> | .272*         | <b>.989**</b>  | <b>-.955**</b> | .587**   | <b>.973**</b> | .576**    | 1         |               |               |               |           |               |               |           |           |
| <b>12</b> | .865**        | -.826**  | .053     | -.713**        | .384**        | .886**         | -.810**        | .561**   | .874**        | .646**    | .853**    | 1             |               |               |           |               |               |           |           |
| <b>13</b> | .734**        | -.738**  | .091     | -.652**        | .209          | .771**         | -.746**        | .493**   | .712**        | .491**    | .739**    | .890**        | 1             |               |           |               |               |           |           |
| <b>14</b> | .711**        | -.726**  | -.207    | -.423**        | .576**        | .691**         | -.543**        | .498**   | .747**        | .719**    | .641**    | .852**        | .591**        | 1             |           |               |               |           |           |
| <b>15</b> | -.633**       | .598**   | .070     | .464**         | -.454**       | -.636**        | .524**         | -.330**  | -.705**       | -.555**   | -.608**   | -.688**       | -.305*        | -.854**       | 1         |               |               |           |           |
| <b>16</b> | .788**        | -.741**  | .179     | -.734**        | .193          | .828**         | -.810**        | .490**   | .774**        | .487**    | .807**    | <b>.922**</b> | <b>.984**</b> | .623**        | -.389**   | 1             |               |           |           |
| <b>17</b> | .711**        | -.725**  | -.215    | -.416**        | .587**        | .688**         | -.536**        | .495**   | .739**        | .726**    | .637**    | .859**        | .603**        | <b>.996**</b> | -.851**   | .632**        | 1             |           |           |
| <b>18</b> | .726**        | -.690**  | .233     | -.730**        | .076          | .779**         | -.796**        | .508**   | .719**        | .387**    | .765**    | .851**        | .955**        | .505**        | -.277*    | <b>.966**</b> | .510**        | 1         |           |
| <b>19</b> | .689**        | -.697**  | -.232    | -.386**        | .605**        | .661**         | -.502**        | .480**   | .734**        | .726**    | .612**    | .819**        | .555**        | .974**        | -.839**   | .580**        | <b>.972**</b> | .449**    | 1         |
|           | <b>1</b>      | <b>2</b> | <b>3</b> | <b>4</b>       | <b>5</b>      | <b>6</b>       | <b>7</b>       | <b>8</b> | <b>9</b>      | <b>10</b> | <b>11</b> | <b>12</b>     | <b>13</b>     | <b>14</b>     | <b>15</b> | <b>16</b>     | <b>17</b>     | <b>18</b> | <b>19</b> |
